# Supplementary material for: Improved Drug Delivery to Brain Metastases by Peptide-Mediated Permeabilization of the Blood–Brain Barrier
Source: Oxford University Press journal article supplement (doi:10.1158/1535-7163.mct-19-0160), 2019-08-29
Supplement: 15357163mct190160-sup-217317_3_supp_5704994_pw436x.pdf [file 15357163mct190160-sup-217317_3_supp_5704994_pw436x.pdf]

# 1    **Supplementary Materials**

2

## 3    **Materials and methods**

4

### 5    **Cell culture**

6            The wild type Madin-Darby canine kidney epithelial cell line (MDCK) was a kind gift from  
7    Tilo Eichler (Department of Clinical Medicine, University of Bergen, Norway) and grown in Eagle's  
8    Minimum Essential Medium (ATCC, Manassas, VA, USA) supplemented with 10% fetal bovine  
9    serum (Thermo Fisher Scientific).

10            Madin-Darby canine kidney epithelial cells (MDCK II) were kindly donated by Professor  
11    Marjo Yliperttula (University of Helsinki, Finland). The cells were transduced with the red  
12    fluorescent protein mCherry (HIV-based lentiviralvector pGreenFire purchased from System  
13    Biosciences Paulo Alto, CA, USA) to also obtain the MDCK II mCherry cell line. The cells were  
14    grown in DMEM (Sigma-Aldrich), supplemented with 1% Penicillin/Streptomycin (BioWhittaker),  
15    1% 200 mM L-Glutamine (BioWhittaker) and 5% fetal bovine serum (Thermo Fisher Scientific).

16            The rat brain endothelial 4 (RBE4) cell line was kindly gifted by Professor Michael Aschner  
17    (Vanderbilt University, Nashville, TN, USA). The cells were grown in 1:1 Hams F10 nutrient mix  
18    (Thermo Fisher Scientific) and Minimum Essential Mix (Thermo Fisher Scientific), supplemented  
19    with 2.5 µL/L human recombinant fibroblast growth factor (Sigma-Aldrich), 5% fetal bovine serum  
20    (Thermo Fisher Scientific) and 150 mg geneticin (Thermo Fisher Scientific).

21            Human cerebral microvascular endothelial cells (hCMEC/D3) were purchased from  
22    MerckMillipore (Burlington, MA, USA) and grown in endothelial basal media-2 (Lonza, Köln,  
23    Germany) supplemented with SingleQuots (Lonza) and 2% human serum (Sigma-Aldrich).

24            Human cerebral cortex-derived astrocytes SC-1800 were purchased from Caltag Medsystems  
25    (Buckingham, UK) and grown in astrocyte basal media (Lonza) supplemented with SingleQuots  
26    (Lonza) and 3% human serum (Sigma-Aldrich).

27           The H1 and H2 cell lines were established «in house» from biopsies from two different  
28 patients with brain metastases from melanoma as previously described (1). Written consent by the  
29 Regional Ethical Committee (#013.09) and the Norwegian Directorate of Health (#9634) was  
30 obtained before tumor tissue was collected and stored. The H1 cells were transduced with lentiviral  
31 vectors encoding the green fluorescent protein variant Dendra and Luciferase to obtain the H1\_DL2  
32 cells for *in vivo* experiments. The H1, H1\_DL2 and H2 cell lines were grown in Dulbecco's Modified  
33 Eagle Medium (DMEM, Sigma-Aldrich Inc., St. Louis, MO, USA) supplemented with 10% heat-  
34 inactivated fetal calf serum (Thermo Fisher Scientific, Waltham, MA, USA), four times the  
35 prescribed concentration of non-essential amino acids (BioWhittaker, Verviers, Belgium), 2% L-  
36 glutamine (BioWhittaker), penicillin (100 IU/mL, BioWhittaker) and streptomycin (100 µL/mL,  
37 BioWhittaker).

38           All cells were kept in a standard tissue culture incubator at 37 °C with 100% humidity and  
39 5% CO<sub>2</sub>. Sub-culturing was done twice a week for the H1, H1\_DL2, H2, hCMEC/D3 and SC-1800  
40 cells, whereas this was done every second day for RBE4, MDCK and MDCK II cells. The endothelial  
41 cells were grown on collagen-coated dishes, prepared by diluting Collagen, Type I from rat tail  
42 (Sigma-Aldrich) in 1 x phosphate-buffered saline (PBS) and distributing this at 7.5 µg/cm<sup>2</sup> culture  
43 dish area. All cell lines were routinely tested for mycoplasma using the MycoAlert Mycoplasma  
44 Detection Kit (LT07-318, Lonza, Basel, Switzerland) according the manufacturers recommendations  
45 and authenticated using short tandem repeat profiling. Upon thawing, the cells were used in  
46 experiments for a maximum of ten passages.

47

#### 48 **K16ApoE peptide synthesis**

49           The linear peptide KKKK-KKKK-KKKK-KKKK-LRVR-LASH-LRKL-RKRL-LRDA-  
50 (OH) necessary for this study was synthesized by the solid phase method using the CEM Liberty  
51 automatic microwave peptide synthesizer (CEM Corporation Inc., Matthews, NC), employing 9-  
52 fluorenylmethyloxycarbonyl (Fmoc) chemistry and commercially available amino acid (Merck

53 Millipore Novabiochem), single coupling (2× coupling for R). Peptides were cleaved from resin using  
54 trifluoroacetic acid (TFA) 95% (v/v); water, 2.5% (v/v); triisopropylsilane (TIS), 2.5% (v/v); two  
55 hours and precipitated by addition of ice-cold diethyl ether. The unprotected peptides were purified  
56 by preparative reverse-phase high performance liquid chromatography (RP-HPLC). Collected  
57 fractions containing purified peptide were pooled and lyophilized. The identity of the peptide was  
58 confirmed by high resolution mass spectrometry (HRMS).

59

## 60 **Evaluation of the *in vivo* toxicity of K16ApoE**

61 K16ApoE was injected as a bolus over 1 minute into the tail vein of 30 female and 8 male 16  
62 weeks old NOD/SCID mice with an average bodyweight of 22.3 g, using peptide concentrations of  
63 50 µg (n=5), 100 µg (n=11), 200 µg (n=5), 400 µg (n=3), 600 µg (n=3), 800 µg (n=3) or 1,000 µg  
64 (n=8). 9 mg/mL NaCl was used to adjust the total injection volume to 100 µL. The animals were  
65 then closely observed for the next two hours and immediately sacrificed if they showed any signs of  
66 acute toxic symptoms. Surviving animals were then observed over 48 hours to detect any signs of  
67 distress such as whisker alterations, cheek bulge, orbital tightening or changes in activity levels.

68 Eight 12-week-old NOD/SCID mice were injected with either 9 mg/mL NaCl or 1,000 µg  
69 K16ApoE in 9 mg/mL NaCl as a bolus over one minute. The cardiac response was monitored by  
70 ultrasound for the subsequent three minutes, which was the time it took before the animals in the  
71 peptide group died. Blood samples were collected from the left ventricle of the heart and blood smears  
72 were stained with eosin to evaluate the morphology. See Supplementary Figure S1A for details.

73

## 74 **DCE-MRI**

75 The T<sub>2</sub> weighted spin echo scans prior to DCE-MRI were acquired with a region of interest  
76 (ROI) over the mouse brain and neck musculature in coronal positioning (TR/TE: 4,000/48 ms, field  
77 of view (FOV): 2.00 cm, matrix size: 256 × 256, slice thickness: 1.00 mm, 7 slices and number of  
78 averages (NEX): 4, total scan time 6 minutes 13 seconds). The T<sub>1</sub> weighted scans were acquired with

the same geometry as the  $T_2$  weighted scans (TR/TE 1,000/9 ms, and NEX: 4, total scan time of 3 minutes, 20 seconds). The perfusion scans were acquired in the middle position of the slice package. First, a series of FLASH sequences were acquired (TR/TE: 37.2/2.1 ms, FOV: 2.00 cm, matrix: 256 × 256, slice thickness, 1.00 mm and NEX: 1, total scan time of ~3 minutes), followed by the DCE-MRI sequence: This consisted of 900 repetitions of the FLASH protocol with the same geometry (TR/TE: 15 ms/2.1 ms, NEX: 1, FA: 17, temporal resolution: 1 second and total scan time of 16 minutes 12 seconds).

The perfusion scans were acquired by initiating a series of six fast low angle shot (FLASH) sequences with flip angles (FAs) 5, 10, 15, 20, 25 and 30 before the DCE-MRI scan sequence was acquired. 0.5 mmol/kg Omniscan (GE Healthcare, Little Chalfont, UK) was injected as a bolus through the tail vein using an injection pump (Harvard Apparatus, Holliston, MA, USA) 15 seconds after starting the DCE sequence.

The DCE-MRI data was analyzed using the Extended Tofts model implemented in nordicICE v2.3 (Nordic NeuroLab, Bergen, Norway) using local arterial input functions (AIFs) obtained from an adjacent neck muscle. AIFs were extracted by blind deconvolution (2), using custom developed routines implemented in Matlab 2015b (Mathworks, Natick, MA, USA). These routines are accessible through the online Perfusion Lab tool, available at <http://perflab.cerit-sc.cz/>. Maps of Area Under the Curve (AUC) and blood-to-tissue transfer constant ( $K^{trans}$ ) were generated, and ROIs were drawn to cover the whole brain section including muscle tissue, white and grey matter.  $K^{trans}$  values were normalized to known values of the extravascular space ( $V_e$ ) and vascular space ( $V_b$ ) fractions in a reference muscle tissue, as previously described (3). Mean and standard deviation values were calculated for each ROI, time point and peptide dose, and statistically significant differences between K16ApoE receiving groups and corresponding 9 mg/mL NaCl receiving groups were established using the Mann-Whitney test function.

## Flow cytometry

105 RBE4 cells were seeded in 6-well plates (Corning, New York, USA) at a density of  $2.5 \times 10^5$   
106 cells per well. After reaching the growth log-phase, the cells were incubated with 5  $\mu\text{g/mL}$  AF647-  
107 BSA (Invitrogen Molecular Probes, Waltham, MA, USA) with or without 20  $\mu\text{g/mL}$  rhodamine-  
108 conjugated K16ApoE for 45 minutes. For incubation in serum-free conditions, the cells were serum-  
109 starved for one hour before incubation in AF647-BSA with or without rhodamine-conjugated  
110 K16ApoE for 45 minutes. For endocytosis inhibition experiments, RBE4, MDCK, hCMEC/D3, H1  
111 and H2 cells were seeded in 6-well plates at a density of  $2.5 \times 10^5$  per well and pre-treated with 80  $\mu\text{M}$   
112 dynasore (a dynamin inhibitor) or 30  $\mu\text{M}$  chlorpromazine (a clathrin inhibitor) for 30 minutes. The  
113 cells were then incubated with Alexa Fluor 647 (AF647)-conjugated BSA at a concentration of 5  
114  $\mu\text{g/mL}$  and 20  $\mu\text{g/mL}$  K16ApoE in the continued presence of the endocytosis inhibitors for 45  
115 minutes. For incubation at 4 °C, the RBE4 cells were pre-cooled on ice for 15 minutes, and then  
116 incubated with 5  $\mu\text{g/mL}$  AF647-BSA with or without 20  $\mu\text{g/mL}$  rhodamine-conjugated K16ApoE for  
117 45 minutes. After incubation, the cells were washed with PBS, trypsinized and centrifuged twice  
118 before they were re-suspended in PBS and taken to the flow cytometer. Rhodamine-conjugated  
119 K16ApoE was excited by the blue laser line and detected using the FL2 detector, whereas AF647-  
120 BSA was excited by the red laser line and detected with the FL7 detector, using a Beckman Coulter  
121 flow cytometer (Beckman Coulter Inc., Brea, CA, USA) or a BD LSR Fortessa (BD Biosciences, San  
122 Jose, CA, USA).

123

#### 124 ***In vitro* cell viability**

125 5,000 MDCK, MDCK II, RBE4, hCMEC/D3 and H1 cells were seeded in each well in 96-  
126 well plates in 100  $\mu\text{L}$  growth medium. After 24 hours of incubation, 100  $\mu\text{L}$  of graded concentrations  
127 of K16ApoE (0.1, 1, 20, 40, 60, 80, 100 or 150  $\mu\text{g/mL}$ ) diluted in growth medium were added to each  
128 well ( $n = 6$ ). 45 minutes later, the peptide was removed before each well was washed twice with PBS,  
129 and 100  $\mu\text{L}$ /well of 0.1 mg/mL resazurin (Sigma-Aldrich) was added. The plates were measured after  
130 four hours at 560 nm excitation and 590 nm emission using a VICTOR X3 multilabel plate reader

131 (Perkin Elmer, Waltham, MA, USA) equipped with WorkOut 2.5 data analysis software. Wells  
132 containing 100  $\mu$ L growth media without cells were used for background corrections. IC<sub>50</sub> doses were  
133 defined as the drug concentration at which 50% of the cell growth was inhibited and was calculated  
134 using GraphPad Prism 7 for Mac OS X (GraphPad Software Inc., San Diego, CA, USA). The  
135 experiments were done in triplicate.

136 A Live/Dead assay (Thermo Fisher Scientific) was carried out using  $5 \times 10^4$  MDCK cells  
137 seeded in  $\mu$ -Slide 4-well glass bottom dishes (Ibidi GmbH, Munich, Germany). The cells were treated  
138 with 0, 20, 40 or 80  $\mu$ g/mL K16ApoE. Immediately after treatment started, solutions of 4 mM  
139 Calcein-AM and 2  $\mu$ M Ethidium Homodimer-1 solutions in the Live/Dead kit were mixed and  
140 distributed to the live cells according to the manufacturer's instructions. A time-lapse imaging  
141 sequence was obtained on a Leica TCS SP8 STED 3 $\times$  confocal microscope (Leica, Wetzlar,  
142 Germany) using a 20 $\times$  objective (HC PL APO CS2 20X/0.75 imm) capturing images every minute  
143 over a time period of 45 minutes. Calcein-AM was excited at 488 nm and emitted between 500-550  
144 nm, and Ethidium Homodimer-1 was excited at 561 nm and emitted between 570-630 nm. The  
145 experiment was carried out once and the confocal images were analysed in FIJI (National Institutes  
146 of Health, Bethesda, MA, USA) by measuring the total signal from the red and green channels in all  
147 images acquired throughout the time-lapse.

148

#### 149 **Scanning electron microscopy**

150 MDCK II or RBE4 cells were seeded on collagen coated 24-well plates (Nunc, Roskilde,  
151 Denmark) with 12 mm  $\varnothing$  coverslips at a density of 4,000 cells/500  $\mu$ L growth medium and allowed  
152 to reach confluency prior to treatment with 0, 20, 40 or 80  $\mu$ g/mL K16ApoE for 45 minutes. The cells  
153 were fixed using 2.7% glutamic acid aldehyde and then washed twice using 0.1 M sodium cacodylate  
154 buffer before post-fixation with 0.1 M OsO<sub>4</sub> in 0.1 M sodium cacodylate buffer and subsequent  
155 washing using 0.1 M sodium cacodylate buffer. The cells were then allowed to dry for 15 minutes in  
156 graded concentrations of ethanol (30, 50, 70, 96 and 100%). Critical point drying was carried out on

157 the coverslips before coating with 5 nm Cd-Au alloy, using a JEOL JFC-2300 HR High Resolution  
158 Fine Coater (JEOL Ltd., Tokyo, Japan). Microscopic analysis was performed using a Scanning  
159 Electron Microscope JEOL JSM-7400F (JEOL Ltd.).

160

#### 161 **Cell adhesion assay**

162 hCMEC/D3 cells were seeded at 5,000 cells per well in 96-well plates (Greiner Bio-One,  
163 Kremsmünster, Austria) and incubated for 24 hours at 37 °C in a 5% CO<sub>2</sub> tissue incubator. K16ApoE  
164 at concentrations 0, 20, 40 or 80 µg/mL were added to the wells and incubated for 45 minutes.  
165 Subsequently, unattached cells were washed away with PBS and adherent cells were fixed with 4%  
166 formaldehyde at 0, 30 and 60 minutes after the peptide was replaced with fresh culture media.  
167 Adherent cells were then stained using 0.1% w/v crystal violet. Absorbance of stained nuclei was  
168 determined using a plate reader (POLARstar OPTIMA BMG Labtech, Ortenberg, Germany) at 570  
169 nm.

170

#### 171 ***In vitro* BBB model**

172 For resistance monitoring using the Electric Cell Substrate Impedance Sensing (ECIS)  
173 system, ECIS arrays (8W10E+, 8 wells; Ibidi GmbH) were stabilized with L-cysteine (10nM; 10  
174 minutes), washed in Hank's balanced salt solution (Thermo-Fisher, UK), coated with recombinant  
175 Human Endorepellin/Perlecan at 10 µg/mL (R&D systems, Minneapolis, MN, USA) and incubated  
176 at 37° C, 5% CO<sub>2</sub> for two hours. After seeding density optimization, 7,500 hCMEC/D3 cells were  
177 then seeded into each well and cell resistance monitored at 4,000 Hz using an ECIS Zθ (Applied  
178 Biophysics, USA) system for 70 hours at 37 °C with 5% CO<sub>2</sub>. 0, 20, 40 or 80 µg/mL of K16ApoE  
179 peptide was then added to the system and resistance was further recorded until recovery of the barrier  
180 was observed. Resistance values were obtained in Ω. For each experiment, at least three replicates  
181 were measured.

182 For the cell automated sensing system, CellZscope<sup>®</sup>, 8 µm pore-size at 0.33 cm<sup>2</sup>,  
183 polycarbonate membrane trans-well inserts (Corning, UK) were used. The transwell inserts were  
184 coated with 10 µg/mL human perlecan (R&D systems, Minneapolis, MN, USA) on the apical side of  
185 the filter membranes and with 5 µg/mL human fibronectin (Sigma-Aldrich) on the basal side of the  
186 filter. 2,500 of SC-1800 cells were seeded on the basal side of the porous filter membrane and left to  
187 adhere for two hours in the laminar flow hood before  $7.5 \times 10^4$  hCMEC/D3 cells were seeded on the  
188 apical side of the filter. The cells were then incubated for 72 hours in the incubator at 37 °C and 5%  
189 CO<sub>2</sub>. The resistance values were recorded using the CellZscope<sup>®</sup> automated cell monitoring system,  
190 CellZscope<sup>®</sup> (nanoAnalytics GmbH, Münster, Germany). Once the resistance plateaued, 0, 20, 40  
191 and 80 µg/mL of K16ApoE was added and TEER values, expressed in  $\Omega \cdot \text{cm}^2$ , were further recorded  
192 in real-time until recovery of the barrier was observed. High TEER values reflected tight junction  
193 formation. For each experiment, at least three replicates were measured.

#### 194 ***In vivo* biodistribution of <sup>125</sup>I–K16ApoE**

195 The imidazole ring of histidine in K16ApoE was labelled with <sup>125</sup>I using 1,3,4,6-tetrachloro-  
196 3 $\alpha$ ,6 $\alpha$ -diphenylglycouril (Iodo-Gen) at pH 9 (4,5). Briefly, 0.1 mg Iodo-Gen (T0656, Sigma-Aldrich)  
197 dissolved in 0.05 mL chloroform was dispersed in a 1.8 mL Nunc tube (Nunc). A film of the virtually  
198 water-insoluble Iodo-Gen was formed in the Nunc vial by allowing the chloroform to evaporate to  
199 dryness under nitrogen. Then, 1 mL 0.05 M phosphate buffer with pH 9.0, containing 2 mg K16ApoE  
200 and 2 MBq <sup>125</sup>I (Institute for Energy Technology, Kjeller, Norway) was added and the iodinating tube  
201 gently agitated for 10 minutes. The reaction was terminated by removing the solution from the Iodo-  
202 Gen tube. The stock solution was stored in the dark at 4 °C. Low molecular weight radioactivity  
203 accounted for about 40% of the total <sup>125</sup>I-activity, and was removed to undetectable levels before use  
204 by Pierce<sup>™</sup> <sup>18</sup>C Spin Columns. <sup>125</sup>I-K16ApoE was validated by reversed phase and size exclusion  
205 chromatography and found to have the essentially similar elution pattern as unlabeled K16ApoE  
206 (Supplementary Figure S6A). Each bolus injection contained about 20 µg <sup>125</sup>I-K16ApoE.

207 Two 18 weeks old NOD/SCID mice were anaesthetized by intramuscular injection of 0.12  
208 mg ketamin and 0.243  $\mu$ g medetomidine per gram bodyweight dissolved in PBS. The core  
209 temperature was maintained at 37 °C with the aid of a heating lamp and a servo-controlled heating  
210 pad. A PE-50 catheter (AgnThos AB, Lidingö, Sweden) was inserted into the carotid artery of each  
211 mouse to allow blood sampling. 20  $\mu$ g  $^{125}$ I-K16ApoE diluted in 50  $\mu$ L 9 mg/mL NaCl was injected  
212 into the tail vein of each mouse as a bolus over one minute. Arterial blood samples were then collected  
213 at 0.5, 1, 5, 10, 15, 20 and 30 minutes after the  $^{125}$ I-K16ApoE administration was completed. The  
214 animals were then sacrificed by injecting saturated KCl into the carotid artery. Immediately after,  
215 brain, skin, heart, lung, liver, stomach, spleen, colon, kidneys, muscle tissue and femur were collected  
216 and counted for  $^{125}$ I activity using a Wallac Wizard 1470 gamma counter (PerkinElmer, Waltham,  
217 MA, USA). The counts were corrected for background values before the peptide distribution was  
218 calculated as  $^{125}$ I activity per gram organ or per 10  $\mu$ L plasma.

219

#### 220 ***In vivo* treatment study**

221 Prior to intracardiac injections, the NOD/SCID mice were anesthetized and fixed in a supine  
222 position on a heating pad to maintain a core temperature at 37° C.  $5 \times 10^5$  H1\_DL2 cells resuspended  
223 in 0.1 mL PBS were injected during 30 seconds into the left cardiac ventricle of each mouse using a  
224 30G insulin syringe (Omnican50, B. Brain Medical AS, Vestskogen, Norway), by ultrasound  
225 guidance (Vevo<sup>(R)</sup> 2100 Imaging System 230 V, Visual Sonics Inc., Toronto, Canada).

226 Contrast enhanced MRI was carried out four and six weeks after start of the treatment  
227 experiment to evaluate the brain metastatic burden. A 7 Tesla small-animal horizontal scanner  
228 (Bruker BioSpin GmbH) equipped with a 72 mm quadrature transmit coil and a four-channel mouse  
229 brain array receive coil was used. A T<sub>2</sub> weighted scan was performed in coronal orientation (TR/TE:  
230 4,000/48 ms, FOV: 2.00 cm, matrix size: 256  $\times$  256, slice thickness: 1.00 mm, number of slices: 7,  
231 NEX: 4, scan time: 6 minutes, 13 seconds) followed by T<sub>1</sub> scans using the same geometrical  
232 parameters (TR: 1,000 ms, TE: 9 ms, and NEX: 4, scan time: 3 minutes, 20 seconds) before and after

233 subcutaneous administration of 0.5 mmol/kg Omniscan (GE Healthcare). The MR images were  
234 analysed in OsiriX Lite v.9.5.2 (Pixmeo SARL, Bernex, Switzerland) to determine the tumor numbers  
235 and volumes ( $\frac{4}{3} \pi r^3$ ) as a measure of metastatic burden.

236

## 237 **Mass spectrometry**

238 A pilot mass spectrometry experiment was performed by a company provider (ImaBiotech,  
239 Loos, France). Briefly, tumor bearing mice treated either with K16ApoE + dabrafenib or saline, were  
240 perfused with 4% formaldehyde, their brains were removed and immediately snap-frozen. Thereafter,  
241 the brains were embedded into paraffine according to standard protocols. 10  $\mu$ m thick brain sections  
242 were mounted onto indium tin oxide conductive glass slides. 1  $\mu$ L MALDI matrix ( $\alpha$ -cyano-4-  
243 hydroxycinnamic acid) was added onto the sections, and the sections were dried under vacuum for  
244 15 minutes. Direct analysis was performed with a 7T-MALDI-FTICR in Full Scan and Continuous  
245 Accumulation of Selected Ions positive mode. The data sets were analysed with DataAnalysis 4.1  
246 (Bruker Daltonics, Bremen, Germany).

247

## 248 **Labelling of albumin and IgG with $^{18}\text{F}$**

249 The *in vivo* BBB opening effect of K16ApoE was further evaluated by PET using  $^{18}\text{F}$ -albumin  
250 from mouse serum (Sigma-Aldrich, cat no A3139) and  $^{18}\text{F}$ -IgG from mouse serum (Sigma-Aldrich,  
251 cat no I5381). The labelling prosthetic group, [ $^{18}\text{F}$ ]F-Py-TFP (6-[ $^{18}\text{F}$ ]Fluoronicotinic acid 2,3,5,6-  
252 tetrafluorophenyl ester), and its precursor, (*N,N,N*-Trimethyl-5-((2,3,5,6-tetrafluorophenoxy)-  
253 carbonyl)pyridin-2-aminium trifluoromethanesulfonate) were made according to previously  
254 published methods (6). The crude reaction mixture of [ $^{18}\text{F}$ ]F-Py-TFP (from 5 mg precursor) was  
255 diluted in 4 mL 20% acetic acid and passed through a preconditioned (5 mL MeCN + 5 mL water)  
256 SepPak Light tC18-cartridge. Unreacted precursor was removed with 5 mL 30% MeCN, and the  
257 cartridge washed with 5 mL water. [ $^{18}\text{F}$ ]F-Py-TFP was eluted from the tC18-cartridge with 1 mL  
258 diethyl ether through a SepPak Dry-cartridge. The ether was removed by evaporation. The freshly

259 made [<sup>18</sup>F]F-Py-TFP was used to label both albumin and IgG. The protein labelling was carried out  
260 by dissolving 1 mg of the protein in 200 µL 0.05 M phosphate buffer (pH ~ 9) and adding [<sup>18</sup>F]F-Py-  
261 TFP dissolved in small amounts of MeCN. The solution was heated to 40 °C and stirred gently for  
262 15 minutes. The product was purified by a PD MidiTrap G-10 size exclusion column, using 9 mg/mL  
263 NaCl solution as an eluent.

#### 265 **Dynamic positron emission tomography/computer tomography (PET/CT) imaging**

266 PET/CT images were acquired on a small-animal nanoScanPC PET/CT scanner (Mediso  
267 Medical Imaging Systems, Budapest, Hungary). Healthy (non-tumor bearing) NOD/SCID mice were  
268 anesthetized using 3% sevoflurane (Abbott Laboratories Ltd.) mixed in oxygen for the duration of  
269 the scans, while monitored for breathing and temperature. CT scans (50 kVp, 300 ms) were performed  
270 for anatomical information and attenuation correction of PET images. ~2 MBq of tracer was injected  
271 into the tail vein and a dynamic acquisition scan (coincidence 1:5, normal count mode) was started  
272 immediately. PET and CT images were co-registered automatically. PET reconstruction was  
273 performed by Nucline software (Mediso) from list-mode using the following parameters:  
274 Reconstruction algorithm Tera-Tomo 3D (OSEM), energy window 400–600 keV, coincidence mode  
275 1:5, voxel size 0.4 mm, four iterations and six subsets, corrections for random events, detector  
276 normalization, decay and dead time. Images were reconstructed to the following time frames: 5 × 2  
277 minutes, 8 × 5 minutes (4 × 5 minutes for the 30 minutes scans). Data analysis was performed using  
278 InterView Fusion (version 3.01.004.0000, Mediso).

279 Four minutes before the PET/CT acquisition, the animals were injected with 200 µg K16ApoE  
280 dissolved in 9 mg/mL NaCl. 24 hours later, the same animals were injected with 9 mg/mL NaCl prior  
281 to repeating the PET/CT acquisition. Thus, each mouse served as their own negative control. For each  
282 animal, an ellipsoid volume of interest (VOI) delineating the skull was drawn to cover the whole  
283 brain of each mouse. The mean standard uptake value (SUV<sub>mean</sub>) was calculated using the following

284 equation:  $SUV_{mean} = C_{PET}(T)/(ID/BW)$ , where  $C_{PET}(T)$  is the mean measured activity in the VOI at  
285 time T, ID is injected dose measured in kBq, and BW is the animal weight in kg.

286

287

288

289 **Supplementary Table 1:** Mean  $V_e$ ,  $K_{ep}$  and AUC after DCE-MRI.

290

| Group   | Minutes | n | $V_e$ (%)          | $K_{ep}$ (min-1) | AUC (a.u.)        |
|---------|---------|---|--------------------|------------------|-------------------|
| K16ApoE | 10      | 5 | $58.98 \pm 31.331$ | $0.31 \pm 0.203$ | $17.73 \pm 5.928$ |
|         | 30      | 5 | $43.08 \pm 23.384$ | $0.09 \pm 0.039$ | $5.78 \pm 1.425$  |
|         | 60      | 6 | $10.82 \pm 8.719$  | $0.20 \pm 0.069$ | $2.65 \pm 1.525$  |
|         | 120     | 5 | $10.42 \pm 10.688$ | $0.39 \pm 0.343$ | $2.62 \pm 0.676$  |
|         | 240     | 5 | $2.126 \pm 1.973$  | $0.74 \pm 0.453$ | $1.68 \pm 0.536$  |
| Saline  | 10      | 8 | $0.681 \pm 0.411$  | $0.59 \pm 0.223$ | $1.64 \pm 0.809$  |
|         | 30      | 5 | $0.872 \pm 0.347$  | $0.69 \pm 0.255$ | $1.48 \pm 0.460$  |
|         | 60      | 6 | $0.90 \pm 0.819$   | $0.69 \pm 0.378$ | $1.42 \pm 0.760$  |
|         | 120     | 5 | $1.202 \pm 0.528$  | $0.69 \pm 0.276$ | $1.83 \pm 0.534$  |
|         | 240     | 5 | $1.22 \pm 0.947$   | $0.74 \pm 0.406$ | $1.68 \pm 0.432$  |

291

292 All values are given as mean  $\pm$  standard deviation. Abbreviations: Min: minutes,  $V_e$ : Fractional  
293 volume of extravascular extracellular space (EES),  $K_{ep}$ : Rate constant from compartment 2 to 1  
294 (reversed  $K^{trans}$ ), AUC: Area under curve, a.u.: arbitrary units.

295

296

297 **Supplementary figures**

298

**A**

Toxicity and BBB permeabilization study (n = 38) 30 ♀ and 8 ♂

|                         |        |        |           |        |        |                           |
|-------------------------|--------|--------|-----------|--------|--------|---------------------------|
| K16ApoE concentrations: |        |        |           |        |        |                           |
| 50 µg                   | 100 µg | 200 µg | 400 µg    | 600 µg | 800 µg | 1 000 µg                  |
| n=5                     | n=11   | n=5    | n=3       | n=3    | n=3    | n=8                       |
| DCE-MRI                 |        |        | Histology |        |        | Ultrasound<br>Bloodsmears |

**B**

Treatment study (n = 45) 45 ♀

|                    |                |                     |                     |                |
|--------------------|----------------|---------------------|---------------------|----------------|
| 200 µg K16ApoE     | NaCl (vehicle) | 10 mg/kg dabrafenib | 10 mg/kg dabrafenib | NaCl (vehicle) |
| n=4                | n=5            | n=12                | + 200 µg K16ApoE    | n=10           |
|                    |                |                     | n=14                |                |
| Control experiment |                |                     | MRI and histology   |                |

299

300 **Supplementary Figure S1**

301 *In vivo* study design. **A**, An illustration of the study design used to evaluate K16ApoE toxicity on a  
302 total number of 38 NOD/SCID mice. **B**, An overview of the 45 NOD/SCID mice used in the *in vivo*  
303 treatment study shown in Figure 5 and Supplementary Figures S7 and S8.

304

305

306

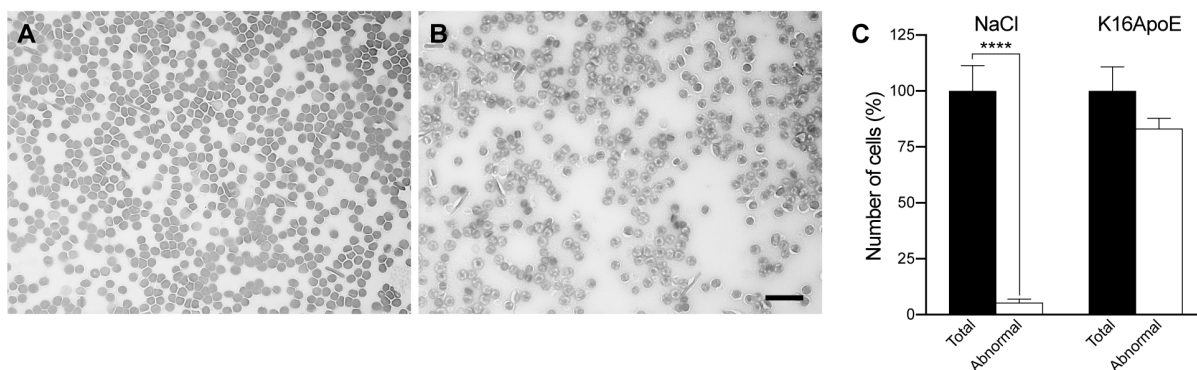

307

308

## Supplementary Figure S2

309

310

311

312

313

314

315

316

Blood smear from mice subjected to 1,000 µg K16ApoE. **A**, A representative phase contrast image of a blood smear sample from a NOD/SCID mouse subjected to 1 000 µg K16ApoE as a bolus injection over approximately one minute. **B**, A representative blood smear from a control NOD/SCID mouse injected with a bolus of 9 mg/mL NaCl. Scalebar 100 µm. **C**, Quantification of the number of erythrocytes with an abnormal morphology as a function of the total cell number per microscope image scaled to 100% (n = 3). Unpaired t-test. Mean ± SEM. Abbreviation: \*\*\*\*: p<0.0001.

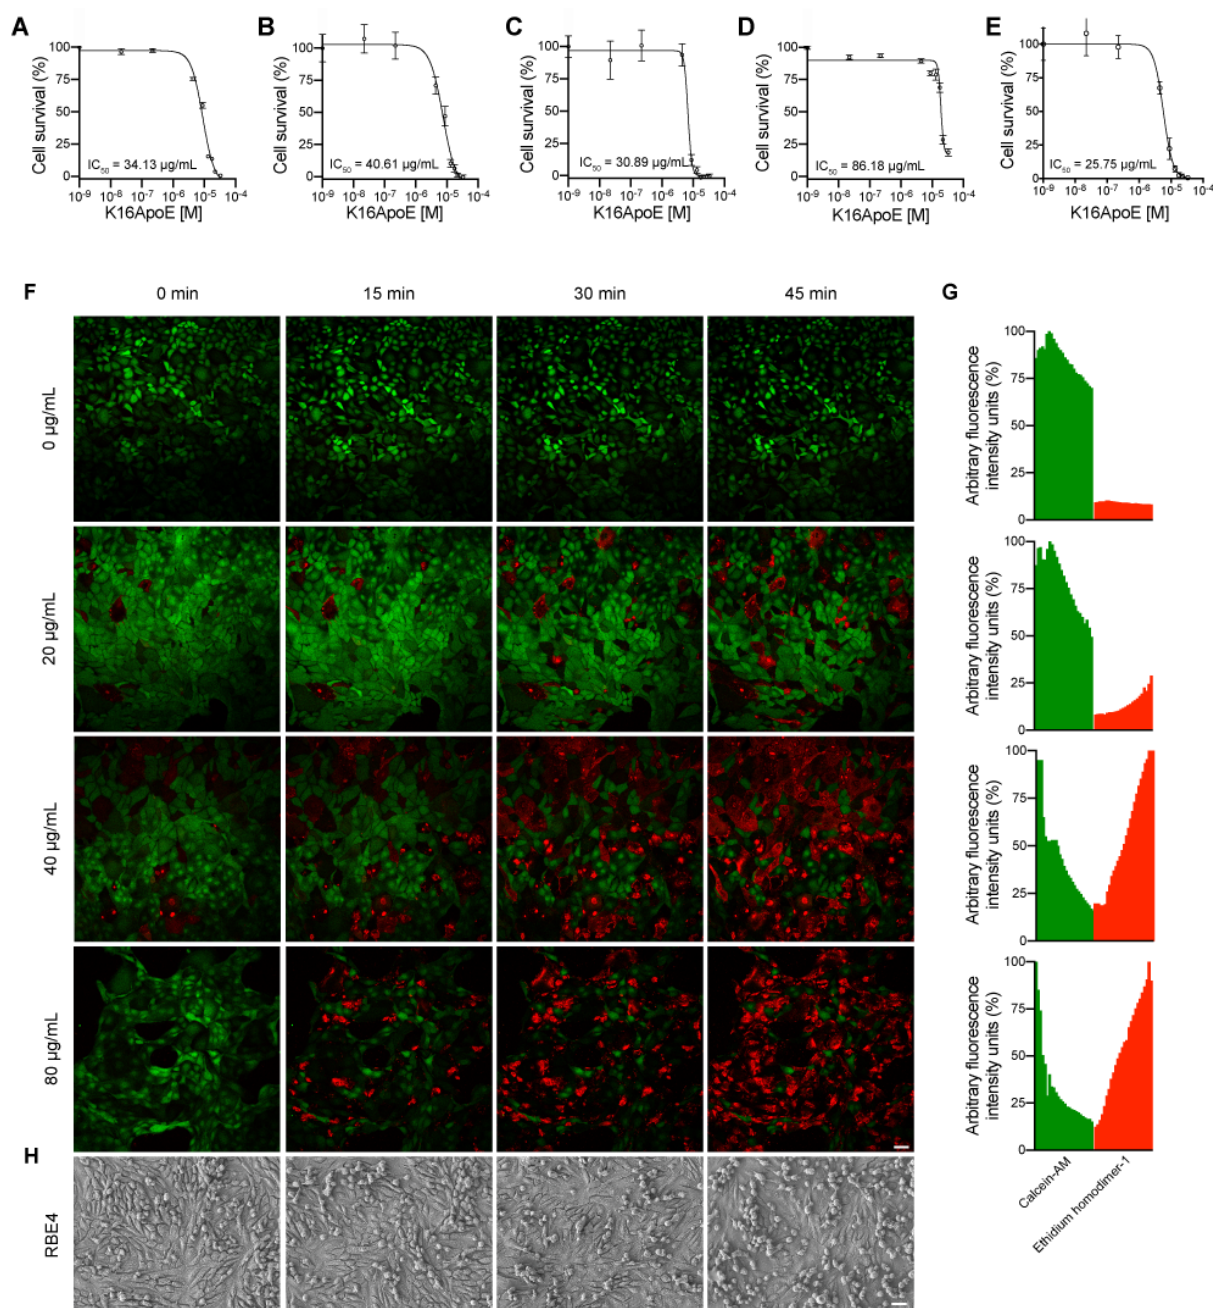

### Supplementary Figure S3

*In vitro* cell viability. **A**, IC<sub>50</sub> curves for RBE4 **B**, MDCK **C**, MDCK II **D**, hCMEC/D3 and **E**, H1 cells after incubation with 0, 0.1, 20, 40, 80, 100 or 150  $\mu\text{g/mL}$  K16ApoE for 45 minutes. **F**, Live/Dead staining of MDCK cells incubated with 0, 20, 40 or 80  $\mu\text{g/mL}$  K16ApoE for 45 minutes. Scalebar 50  $\mu\text{m}$ . **G** Quantification of live (green) and dead (red) cells in **f**. **H** SEM images of RBE4 cells treated with 80  $\mu\text{g/mL}$  K16ApoE. Scalebar 20  $\mu\text{m}$ .

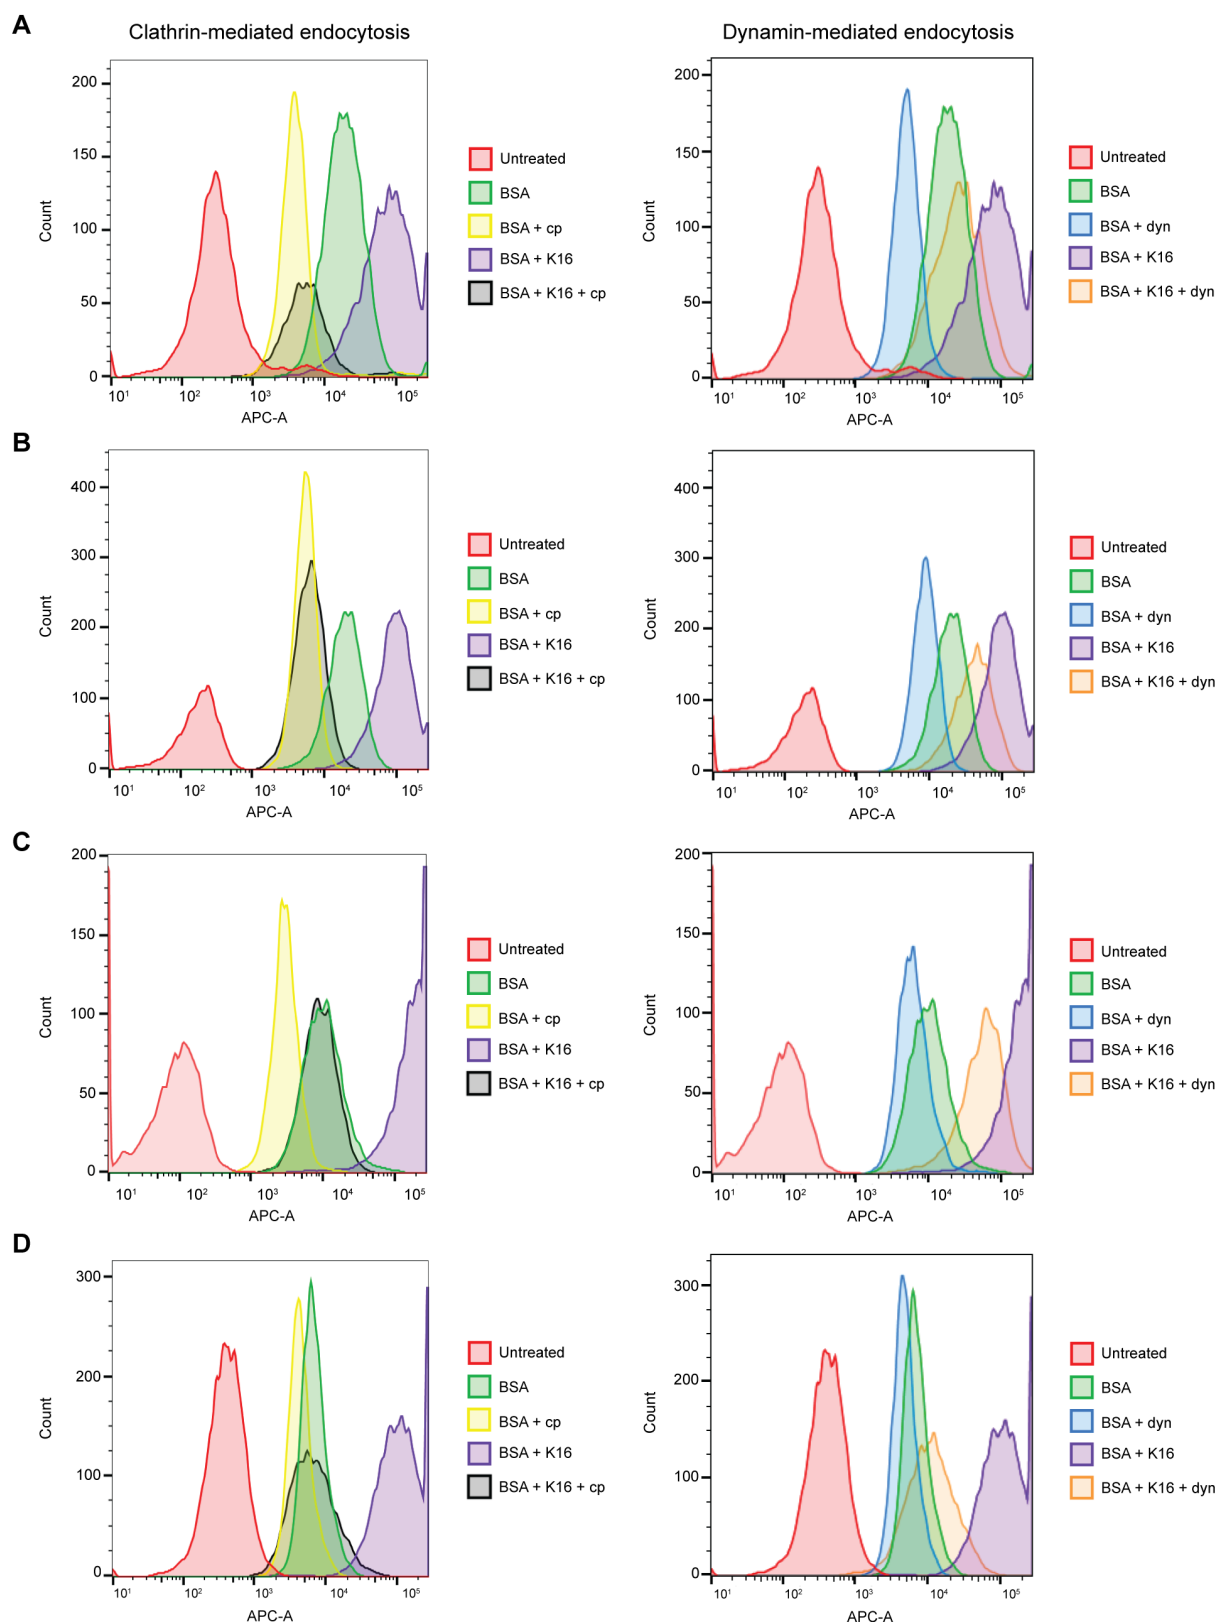

# Supplementary Figure S4

Mechanistic studies of the *in vitro* effects of K16ApoE **A**, Flow cytometry data showing the effects of two endocytosis inhibitors; chlorpromazine (left) and dynasore (right) after 30 minutes of incubation on H1, **B**, H2, **C**, hCMEC/D3 and **D**, MDCK cells measured as BSA uptake in the APC-

331 A channel. Abbreviations: APC-A: allophycocyanin-A, BSA: bovine serum albumin, cp:  
332 chlorpromazine, dyn: dynasore, K16: K16ApoE.

333

334

335

336

337

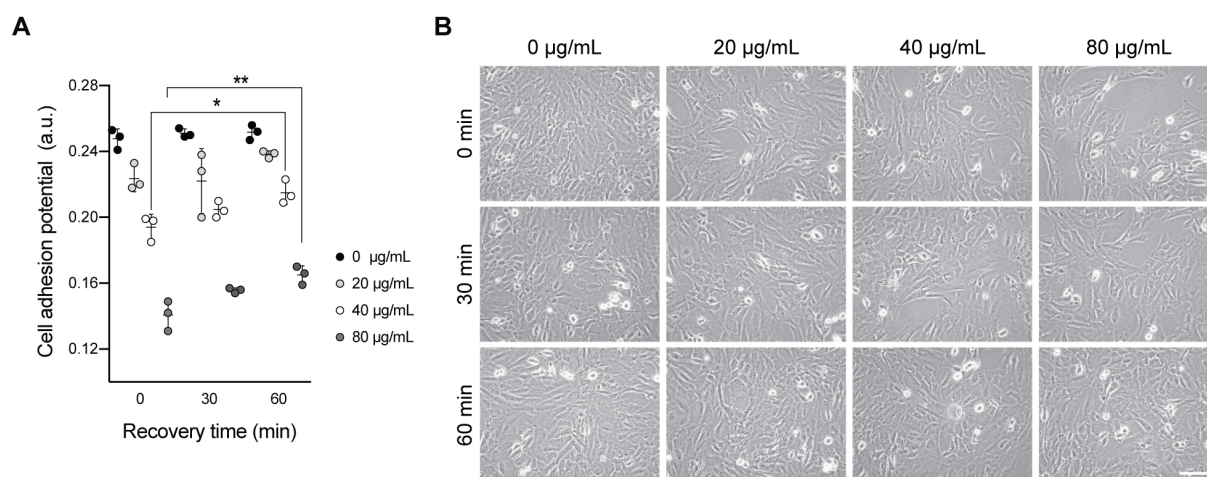

### Supplementary Figure S5

*In vitro* BBB model. **A**, Adhesion of hCMEC/D3 cells after incubation with 0, 20, 40 or 80 µg/mL of K16ApoE for 45 minutes as measured by crystal violet. 2way ANOVA statistical test. Mean  $\pm$  SEM.

**B**, Phase contrast images of hCMEC/D3 cells after corresponding incubation times and concentrations with the peptide. Scalebar 50 µm. Abbreviations: \*:  $p < 0.05$ , \*\*:  $p < 0.01$ .

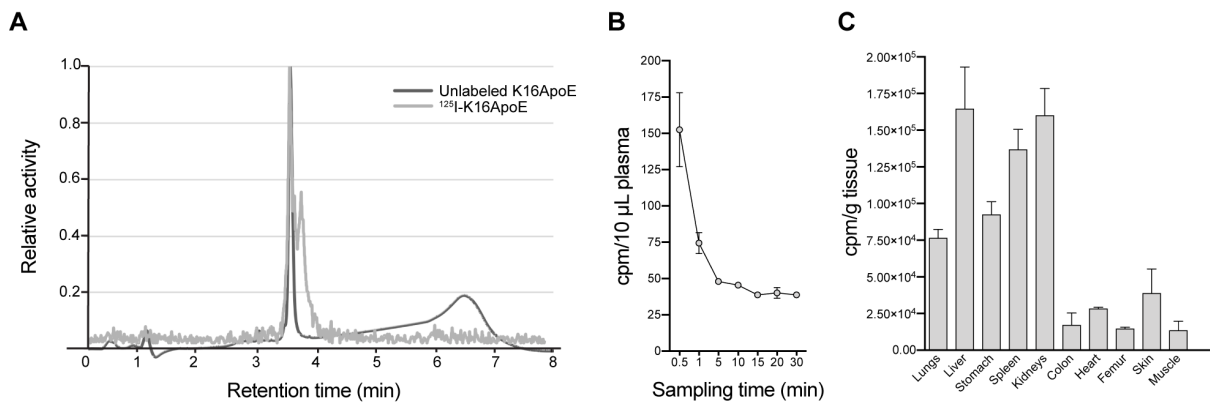

### Supplementary Figure S6

Biodistribution of  $^{125}\text{I}$ -K16ApoE. **A**, Elution profiles demonstrating native K16ApoE and  $^{125}\text{I}$ -K16ApoE. **B**, Temporal elimination of the  $^{125}\text{I}$ -K16ApoE from blood plasma (n=3) during 30 minutes. Mean  $\pm$  SEM. **C**, Accumulation of  $^{125}\text{I}$ -K16ApoE within the specified tissues (n=3) after 30 minutes given in cpm/g. Mean  $\pm$  SEM. Abbreviations:  $^{125}\text{I}$ : iodide-125, cpm: counts per minute.

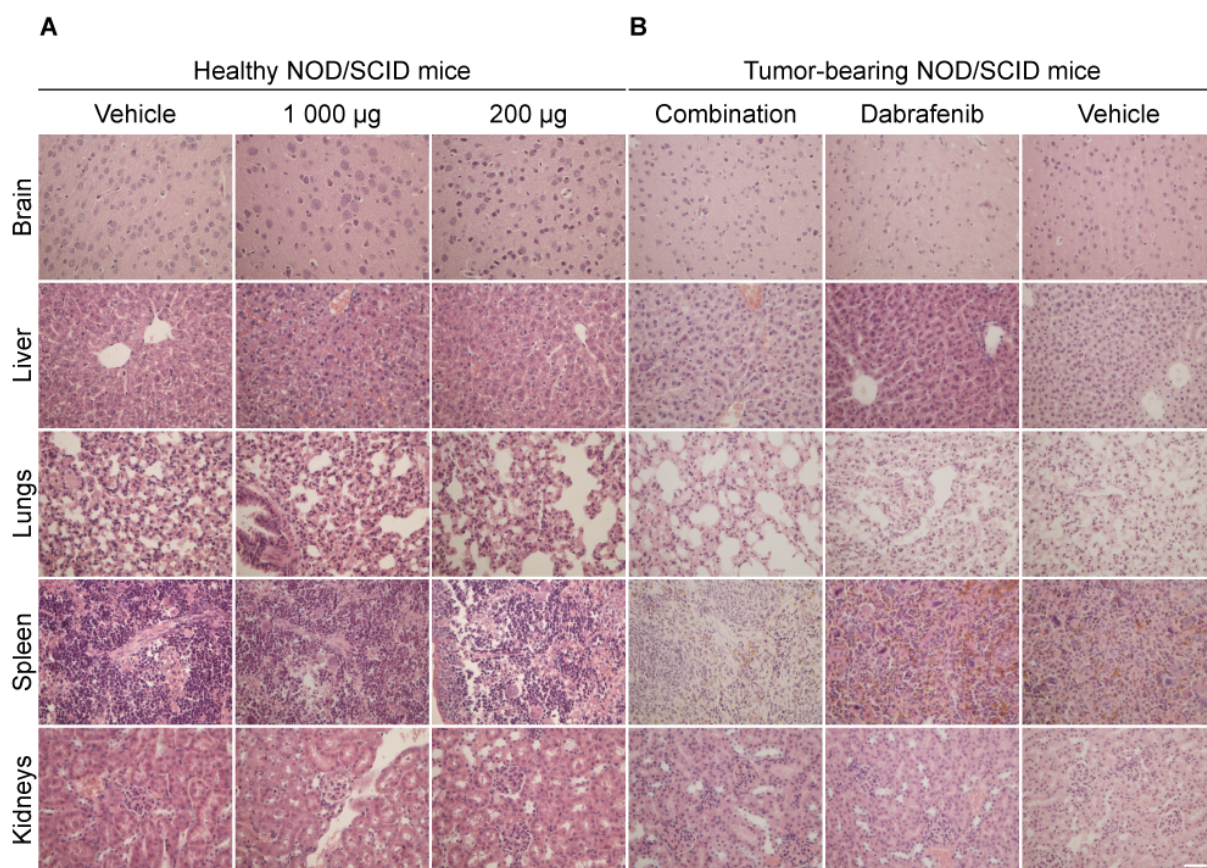

# **Supplementary Figure S7**

Histopathological evaluation of tissue samples after long- and short-term treatment of NOD/SCID mice with the peptide. **A**, Tissue preparations from NOD/SCID mice treated once with the peptide. **B**, Tissue preparations from tumor-bearing NOD/SCID mice treated with the peptide twice a week over six weeks, drug only or vehicle. Scalebar 200 µm.

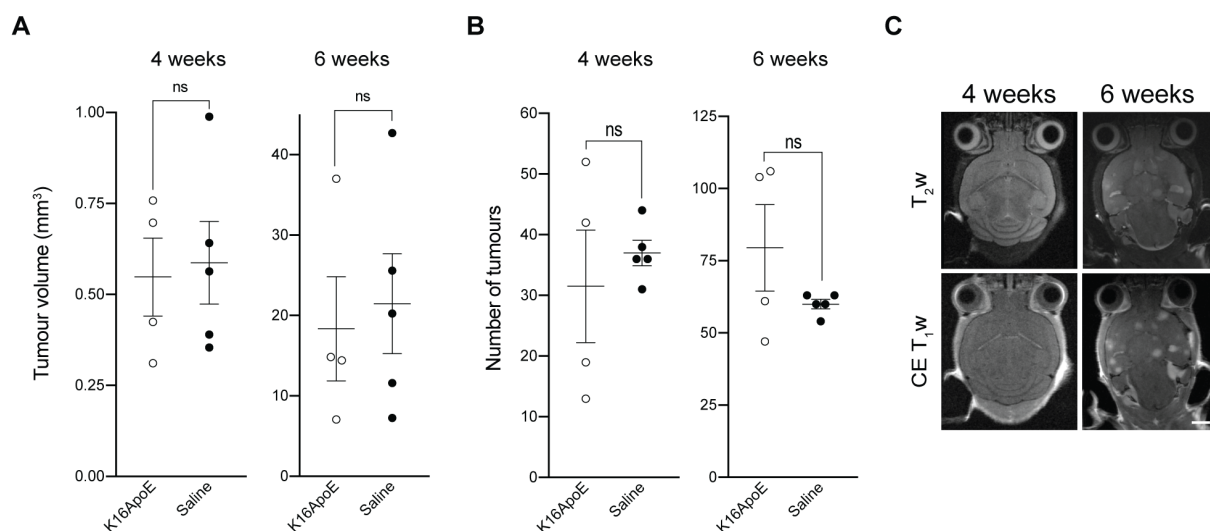

### Supplementary Figure S8

*In vivo* treatment control experiment. **A**, Mean, total volume of brain metastases four (left) and six weeks (right) after commencing the control experiment, treating mice with saline or K16ApoE only. Mann-Whitney statistical test. Mean  $\pm$  SEM **B**, Mean, total number of tumors four (left) and six weeks (right) after start of the control experiment. Mann-Whitney statistical test. Mean  $\pm$  SEM. **C**, Representative contrast enhanced T<sub>1</sub> and T<sub>2</sub> weighted MRI images after four (left) and six (right) weeks. Abbreviations: CE: Contrast enhanced, T<sub>1</sub>: T<sub>1</sub> MRI weighting, T<sub>2</sub>: T<sub>2</sub> MRI weighting.

### A Working standard

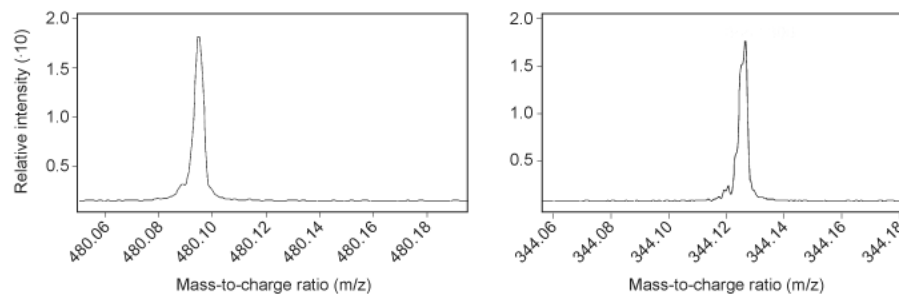

### B Negative control mouse

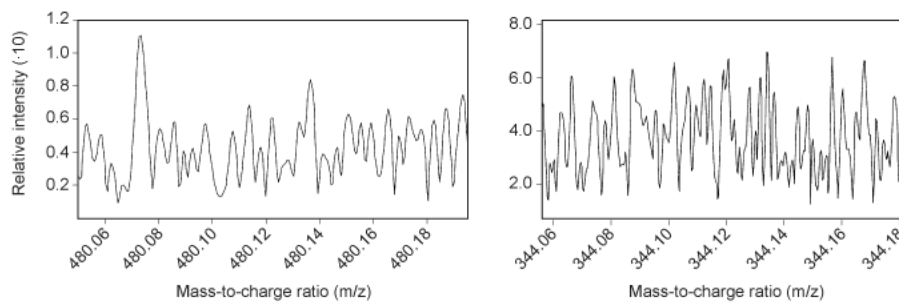

### C K16ApoE + dabrafenib treated mouse

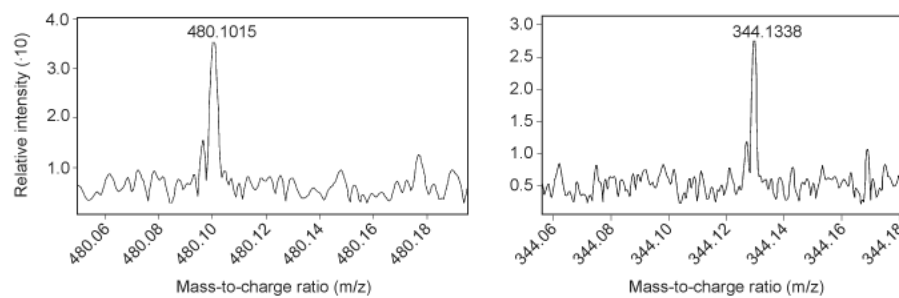

## Supplementary Figure S9

Mass spectrometry of treated and untreated brain tissue. **A**, Dabrafenib (m/z 520.108) was fragmented and detected at m/z 480.1 and 344.1, as seen in the working standard. **B**, In the tissue sample originating from the brain of an untreated NOD/SCID mouse, none of these fragments were detected. **C**, In the tissue sample of a NOD/SCID mouse treated with a combination of K16ApoE and dabrafenib, the same fragments as in A were detected.

389 **Legends to Supplementary Videos**

390

391 **Supplementary Video S1:** Sonographic visualization of the axial position of the heart of a  
392 NOD/SCID mouse injected with 9 mg/mL NaCl intravenously.

393

394 **Supplementary Video S2:** Sonographic visualization of the axial position of the heart of a  
395 NOD/SCID mouse injected with 1 000 µg K16ApoE intravenously.

396

397 **Supplementary Video S3:** A time-lapse series recorded on a Leica TCS SP8 STED confocal  
398 microscope, showing a control sample of MDCK cells labeled with Calcein-AM (green), which  
399 indicates live cells and Ethidium homodimer-1 (red), indicating dead cells.

400

401 **Supplementary Video S4:** A time-lapse series recorded on a Leica TCS SP8 STED confocal  
402 microscope, showing MDCK cells treated with 20 µg of K16ApoE immediately after labelling with  
403 calcein-AM, indicating live cells (green) and ethidium homodimer-1, indicating dead cells (red).

404

405 **Supplementary Video S5:** A time-lapse series recorded on a Leica TCS SP8 STED confocal  
406 microscope, showing MDCK cells treated with 40 µg of K16ApoE immediately after labelling with  
407 calcein-AM, indicating live cells (green) and ethidium homodimer-1, indicating dead cells (red).

408

409 **Supplementary Video S6:** A time-lapse series recorded on a Leica TCS SP8 STED confocal  
410 microscope, showing MDCK cells treated with 80 µg of K16ApoE immediately after labelling with  
411 calcein-AM, indicating live cells (green) and ethidium homodimer-1, indicating dead cells (red).

412

413

414

415 **Bibliography**

- 416 1. Wang J, Daphu I, Pedersen PH, Miletic H, Hovland R, Mork S, *et al.* A novel brain  
417 metastases model developed in immunodeficient rats closely mimics the growth of  
418 metastatic brain tumours in patients. *Neuropathol Appl Neurobiol* **2011**;37(2):189-205 doi  
419 10.1111/j.1365-2990.2010.01119.x.  
420
- 421 2. Kratochvila J, Jirik R, Bartos M, Standara M, Starcuk Z, Jr., Taxt T. Distributed capillary  
422 adiabatic tissue homogeneity model in parametric multi-channel blind AIF estimation using  
423 DCE-MRI. *Magn Reson Med* **2016**;75(3):1355-65 doi 10.1002/mrm.25619.  
424
- 425 3. Keunen O, Johansson M, Oudin A, Sanzey M, Rahim SA, Fack F, *et al.* Anti-VEGF  
426 treatment reduces blood supply and increases tumor cell invasion in glioblastoma. *Proc Natl*  
427 *Acad Sci U S A* **2011**;108(9):3749-54 doi 10.1073/pnas.1014480108.  
428
- 429 4. Fraker PJ, Speck JC, Jr. Protein and cell membrane iodinations with a sparingly soluble  
430 chloroamide, 1,3,4,6-tetrachloro-3a,6a-diphenylglycoluril. *Biochem Biophys Res Commun*  
431 **1978**;80(4):849-57.  
432
- 433 5. Salacinski PR, McLean C, Sykes JE, Clement-Jones VV, Lowry PJ. Iodination of proteins,  
434 glycoproteins, and peptides using a solid-phase oxidizing agent, 1,3,4,6-tetrachloro-3  
435 alpha,6 alpha-diphenyl glycoluril (Iodogen). *Anal Biochem* **1981**;117(1):136-46.  
436
- 437 6. Olberg DE, Arukwe JM, Grace D, Hjelstuen OK, Solbakken M, Kindberg GM, *et al.* One  
438 step radiosynthesis of 6-[(18F)fluoronicotinic acid 2,3,5,6-tetrafluorophenyl ester  
439 ([18F]F-Py-TFP): a new prosthetic group for efficient labeling of biomolecules with  
440 fluorine-18. *J Med Chem* **2010**;53(4):1732-40 doi 10.1021/jm9015813.  
441
